# Supplementary material
Source: ML conference proceedings conference paper supplement (https://openaccess.thecvf.com/content/WACV_2020/html/Piergiovanni_Learning_Multimodal_Representations_WACV_2020_paper.html)
Supplement: Supplementary file 1 [file Piergiovanni_Learning_Multimodal_Representations_WACV_2020_supplemental.pdf]

# Learning Multimodal Representations For Unseen Actions

## – Supplementary Material –

AJ Piergiovanni<sup>1</sup>

Michael S. Ryoo<sup>1,2</sup>

<sup>1</sup>Indiana University, <sup>2</sup>Stony Brook University

{ajpiergi, mryoo}@indiana.edu

### A. Implementation/training details

We implement our models in PyTorch. For the per-segment video CNN, we use I3D [2] to obtain a  $1024 \times T$  video representation. We trained a version of I3D based on Kinetics-600, but withheld all classes that appear in ActivityNet, HMDB51, or UCF101 so that the classes are truly unseen. This resulted in a training set with 478 classes and 278k videos. Since generating videos is an extremely challenging task, the video autoencoders start with and generate the I3D feature. We use GloVe word embeddings [3] to obtain a language representation. We set  $N = 4$  for the temporal attention filters and apply 4 fully connected layers. These layers are followed by  $L_2$  normalization so that the embedding space has unit length [5]. We train the models for 200 epochs and use stochastic gradient descent with momentum to minimize the loss function with a learning rate of 0.01. After every 50 epochs, we decay the learning rate by a factor of 10. When training in the adversarial setting (e.g., Algorithm 1 in the main paper), we initialize the network training for 50 epochs on paired data followed by 200 on the paired + unpaired data.

#### A.1. Unseen video captioning

As our model learns a bi-directional mappings, we can apply our model to generate video captions. Existing video captioning models are unable to create realistic captions for unseen activities, as without training data they do not know the words to describe the video. Given a video,  $v$ , we can generate a caption by mapping the video to text  $t = G_T(E_V(v))$ . For each word, we then use nearest neighbors matching with the GloVe embeddings to obtain the words to form a sentence. In Table 1, we report the commonly used METEOR [1] and CIDEr [6] scores of our various models, measured with the unseen classes from the ActivityNet dataset. We find that learning a joint representation is beneficial and using unpaired samples further improves the task. Note that this task is extremely challenging, as it requires the model to generate captions using activity words (e.g., basketball) not seen during training.

Table 1. Comparison of several models for unseen activity captioning using the ActivityNet dataset, using METEOR and CIDEr scores. This evaluation was done on 10 unseen classes held out during training. Higher values are better.

|                           | METEOR | CIDEr |
|---------------------------|--------|-------|
| Fixed Text Representation | 3.64   | 8.95  |
| Joint                     | 4.21   | 9.23  |
| All (paired)              | 5.31   | 11.21 |
| All (paired + unpaired)   | 6.89   | 13.95 |

Table 2. Comparison of temporal pooling methods for 5 unseen classes in the ActivityNet dataset.

|                            | Accuracy |
|----------------------------|----------|
| Max Pooling                | 23.4     |
| Sum Pooling                | 24.1     |
| LSTM                       | 42.3     |
| Temporal Attention Filters | 55.2     |

### B. Additional Experiments

#### B.1. Comparison of temporal pooling methods

To confirm that temporal attention is beneficial, we compare different forms of temporal pooling (i) max-pooling, (ii) sum-pooling, (iii) LSTM, and (iv) temporal attention filters [4]. In Table 2, we compare these temporal pooling methods learning the joint embedding space. We confirm that using the temporal attention filters performs best.

#### B.2. Comparison of different ratios of paired and unpaired data

We compare different ratios of paired and unpaired data to see how much paired data we require and how much unpaired data is beneficial. For these experiments, we use all the loss terms (i.e., what provided us the best results). Note that in these experiments, the total number of samples was the same for each method (40k examples) so that we can directly compare the effects of unpaired data vs. paired data. Thus not all the available data was used.

In Table 3, we show the results. We find that using no paired data results in nearly random performance, but using some paired data greatly improves the embedding

Table 3. Comparison of different ratios of paired and unpaired data methods for 5 unseen classes in the ActivityNet dataset.

| Paired/Unpaired | Accuracy |
|-----------------|----------|
| 100% / 0%       | 74.2     |
| 75% / 25%       | 73.2     |
| 50% / 50%       | 69.7     |
| 25% / 75%       | 62.6     |
| 0% / 100%       | 24.5     |

Table 4. Comparison using 40k paired examples and varying amounts of unpaired samples for 5 unseen classes in the ActivityNet dataset.

| Unpaired Samples | Accuracy |
|------------------|----------|
| 0                | 77.1     |
| 10k              | 82.4     |
| 20k              | 83.9     |
| 40k              | 83.6     |
| 60k              | 83.5     |

space. The model using 100% paired data performs best, as all the others are using less overall paired data.

We also compare augmenting our 40k paired training samples with different amounts of unpaired data. Since UCF101 and HMDB only have 13k and 7k examples, to get up to 60k samples, we also use videos from the Kinetics dataset [2]. The results, shown in Table 4, show that adding the initial 10k samples is most beneficial, while additional samples do not seem to meaningfully improve results. However, due to our training method where each batch consists of 50% paired data and 50% unpaired data, the additional unpaired data does not harm results either.

### B.3. MLB-YouTube Captions

In Fig. 1, we compare t-SNE embeddings of the fixed text representation and our joint embedding space. This visually shows that learning a joint embedding space gives more distinct class distributions.

#### B.3.1 MLB-YouTube Captions

As a baseline for the MLB-YouTube captions dataset, we compared several different models for standard video captioning (i.e., all activity classes are seen). This task is quite challenging compared to other datasets as the announcers commentary is not always a direct description of the current events. Often the announcers tell loosely related stories and attempt to describe events differently each time to avoid repetition. Additionally, the descriptions contain on average 150 words for each 30 second interval and current captioning approaches usually only trained and tested on 10-20 word sentences. Due to these factors, this task is quite challenging the standard evaluation metrics do not account for these factors. In Table 5, we report our results on this task.

Table 5. Comparison of several models for standard, seen video captioning using the MLB-YouTube dataset, using Bleu, METEOR and CIDEr scores. Higher values are better.

|                           | Bleu | METEOR | CIDEr |
|---------------------------|------|--------|-------|
| Fixed Text Representation | 0.12 | 0.04   | 0.12  |
| Joint Representation      | 0.14 | 0.08   | 0.15  |
| Joint + all paired        | 0.15 | 0.10   | 0.18  |
| Joint + paired + unpaired | 0.10 | 0.02   | 0.08  |

Table 6. Comparison of various pronouns on the UCF101 dataset with 50 unseen classes.

|                    | Accuracy |
|--------------------|----------|
| Baseline Sentences | 33.4     |
| All ‘man’          | 33.2     |
| All ‘woman’        | 33.3     |
| All ‘person’       | 33.4     |
| Random pronoun     | 33.4     |

### C. HMDB and UCF101 Sentences

For the HMDB and UCF101 datasets, we created sentences to describe each activity class. Our sentences descriptions are included in this appendix.

These sentences are written for each activity class (by randomly selecting a single video per class) and are shared for all instances of the activity. Depending on what video was randomly chosen for the class, some sentences describe the actor as a ‘man’, ‘woman’, or ‘person’ which could confuse the model. Ideally, the CNN embedding needs to learn to ignore the impact of such pronoun changes.

We conducted experiments comparing randomly replacing the pronouns to determine if there was any bias introduced by the pronouns. We show the results in Table 6. We find that the choice of pronouns does not impact performance, as our model automatically learns to focus more on verbs rather than pronouns. When examining the temporal attention filters on the sentences, we found that they placed very little ‘attention’ on the start of the sentence, where the pronoun usually is, suggesting that the pronoun has very little effect on the embedding space we learned.

HMDB:

1. chew: a woman is chewing on bread
2. golf: a man swings a golf club
3. sword exercise: a person is playing with a sword
4. walk: a person is walking
5. jump: a person jumps into the water
6. pour: a man pours from a bottle
7. laugh: a man is laughing
8. shoot gun: a person rapidly fires a gun

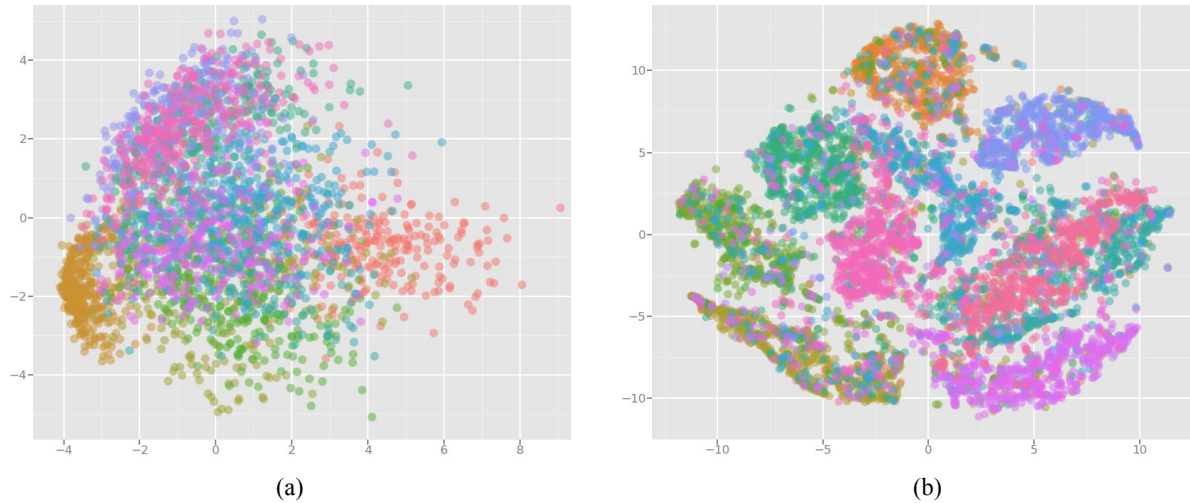

Figure 1. t-SNE mapping of (a) fixed text representation and (b) joint embedding with all paired losses for the MLB-YouTube dataset. The joint embedding space provides most distinct representations for the activities. Each color represents the activity class of the video (e.g., swing, hit, foul ball, etc.).

- |                                                     |                                                    |
|-----------------------------------------------------|----------------------------------------------------|
| 9. run: a person is running                         | 30. drink: a man drinks from a bottle              |
| 10. turn: a person turns around                     | 31. punch: a woman punches a man                   |
| 11. ride bike: a man is riding a bike on the street | 32. wave: a person waves their hand                |
| 12. swing baseball: a boy hits a baseball           | 33. talk: a person is talking                      |
| 13. draw sword: a person draws a sword              | 34. kiss: a man and woman kiss                     |
| 14. sit: a person sits in a char                    | 35. catch: a boy catches a ball                    |
| 15. fencing: two men are fencing                    | 36. smoking: a woman smokes a cigarette            |
| 16. dribble: a boy dribbles a basketball            | 37. eat: a man eats pizza                          |
| 17. stand: a person stands up                       | 38. throw: a person throws a ball                  |
| 18. pushup: a man does pushups                      | 39. climb stairs: a man is running down the stairs |
| 19. sword: two people are fighting with swords      | 40. kick ball: a person kicks a soccer ball        |
| 20. pullup: a boy does pullups in a doorway         | 41. ride horse: a girl is riding a horse           |
| 21. smile: a man smiles                             | 42. fall floor: a man is pushed onto the ground    |
| 22. shake hands: two people shake hands             | 43. brush hair: a girl is brushing her hair        |
| 23. shoot ball: a person shoots a basketball        | 44. situp: a man does situps                       |
| 24. kick: a person kicks another person             | 45. cartwheel: a guy runs and jumps and flips      |
| 25. somersault: a person does a somersault          | 46. pick: a man picks a book                       |
| 26. flic flac: a boy does a backflip                | 47. push: a boy pushes a table                     |
| 27. hug: two people hug                             | 48. climb: a man is climbing up a wall             |
| 28. hit: a boy swings a baseball bat                | 49. handstand: three girls do handstands           |
| 29. dive: a person jumps into a lake                | 50. clap: a woman claps her hands                  |

51. shoot bow: a person shows a bow and arrow

UCF101:

1. MilitaryParade: people are marching and waving a flag
2. TrampolineJumping: kids are jumping on a trampoline
3. PlayingDaf: a person moves a circle and hits it
4. SalsaSpin: people are dancing and spinning
5. CuttingInKitchen: a person is in the kitchen using a knife
6. ApplyEyeMakeup: a woman is putting on makeup
7. PlayingViolin: a person plays the violin
8. YoYo: a person plays with a yoyo
9. PlayingCello: a person is playing the cello
10. Bowling: a person is bowling
11. UnevenBars: a woman is spinning and flying on bars
12. BalanceBeam: a woman is on the balance beam
13. SkyDiving: people are falling out of the sky
14. SumoWrestling: two fat people are wrestling
15. PushUps: a man does pushups
16. FloorGymnastics: a girl does gymnastics
17. ApplyLipstick: a woman is putting on lipstick
18. BreastStroke: a woman is swimming
19. GolfSwing: a man swings a golf club
20. PlayingDoh: a person hits on a drum
21. HorseRiding: a woman rides a horse
22. PlayingFlute: a person blow into a flute
23. PizzaTossing: a man is making a pizza
24. CleanAndJerk: a person is lifting weights
25. WritingOnBoard: a person is writing on the wall
26. CricketShot: a person hits a ball with a bat
27. FieldHockeyPenalty: a girl in the field shoots a ball
28. HammerThrow: a person spins and throws an object
29. BodyWeightSquats: a man is squatting
30. CliffDiving: a person jumps off a cliff
31. Typing: a person is typing at a computer

32. MoppingFloor: a man mops the floor

33. TaiChi: people are doing tai chi

34. PlayingPiano: a person plays piano

35. Punch: someone punches another person

36. Nunchucks: a person swings nun chucks

37. RopeClimbing: a person climbs a rope

38. Swing: a baby is swinging

39. Knitting: a woman is knitting

40. Rafting: people are rafting on a river

41. PlayingGuitar: a person strums a guitar

42. ShavingBeard: a man shaves his beard

43. JugglingBalls: a person is juggling balls

44. Diving: a boy dives into a pool

45. JumpingJack: a person jumps and swings his arms

46. VolleyBallSpiking: people hit a volleyball

47. PoleVault: a person runs with a pole and launches into the air

48. SkateBoarding: a man is skateboarding

49. BoxingPunchingBag: a man is punching a bag

50. IceDancing: people are ice skating

51. WallPushups: a person does pushups against a wall

52. FrisbeeCatch: a person jumps and catches a frisbee

53. Drumming: people are drumming

54. JumpRope: a girl is jumping rope

55. HeadMassage: a person gets their head massaged

56. PlayingTabla: a person plays two drums

57. TableTennisShot: people are playing table tennis

58. PommelHorse: a person spins around on their hands

59. HighJump: a man jumps over a bar and lands on his back

60. BasketballDunk: a man jumps and dunks the basketball

61. BoxingSpeedBag: a man punches a bag in the air quickly

62. PullUps: a person does hangs on a bar and pulls up

- 63. RockClimbingIndoor: a person is climbing up rocks
- 64. BlowingCandles: a boy blows out candles on a cake
- 65. Skiing: people are skiing on a mountain
- 66. WalkingWithDog: a person walks a dog
- 67. Basketball: men are playing basketball
- 68. SoccerJuggling: a person is playing with a soccer ball
- 69. Fencing: people are fencing
- 70. Billiards: a man is playing billiards
- 71. BaseballPitch: a man throws a baseball
- 72. BlowDryHair: a woman is drying her hair
- 73. CricketBowling: a person throws a cricket ball
- 74. BandMarching: people are walking down the street playing music
- 75. PlayingSitar: a person plays a funny guitar
- 76. ThrowDiscus: a person spins and throws a disk
- 77. StillRings: a man holds in the air on rings
- 78. Lunges: a person bends to the ground with one knee
- 79. Skijet: a person rides a jetski in the ocean
- 80. BabyCrawling: a baby is crawling on the floor
- 81. Mixing: a woman is mixing in a bowl
- 82. Hammering: a person is hitting nails with a hammer
- 83. Shotput: a person spins and launches a ball
- 84. Archery: a man shoots a bow and arrow
- 85. Surfing: a man is surfing in the ocean
- 86. FrontCrawl: a person is swimming freestyle
- 87. HulaHoop: a person spins a hoop around their waist
- 88. JavelinThrow: a person throws a spear
- 89. Rowing: people are in a canoe and rowing
- 90. Kayaking: a person is kayaking on a lake
- 91. ParallelBars: a man does gymnastics on the parallel bars
- 92. HorseRace: horses are racing around a track
- 93. HandstandWalking: a person stands on their hands and walk
- 94. BrushingTeeth: a boy brushes his teeth
- 95. LongJump: a person runs and jumps into a sand pit
- 96. Biking: people are riding bikes
- 97. HandstandPushups: a person does pushups upside down
- 98. BenchPress: a man is lifting weights
- 99. Haircut: a person is getting a hair cut
- 100. TennisSwing: a woman hits a tennis ball

## References

- [1] S. Banerjee and A. Lavie. Meteor: An automatic metric for mt evaluation with improved correlation with human judgments. In *Proceedings of the acl workshop on intrinsic and extrinsic evaluation measures for machine translation and/or summarization*, 2005.
- [2] J. Carreira and A. Zisserman. Quo vadis, action recognition? a new model and the kinetics dataset. In *Proceedings of the IEEE Conference on Computer Vision and Pattern Recognition (CVPR)*, 2017.
- [3] J. Pennington, R. Socher, and C. D. Manning. Glove: Global vectors for word representation. In *Empirical Methods in Natural Language Processing (EMNLP)*, 2014.
- [4] A. Piergiovanni, C. Fan, and M. S. Ryoo. Learning latent sub-events in activity videos using temporal attention filters. In *Proceedings of the American Association for Artificial Intelligence (AAAI)*, 2017.
- [5] M. Tygert, A. Szlam, S. Chintala, M. Ranzato, Y. Tian, and W. Zaremba. Convolutional networks and learning invariant to homogeneous multiplicative scalings. *arXiv preprint arXiv:1506.08230*, 2015.
- [6] R. Vedantam, C. Lawrence Zitnick, and D. Parikh. Cider: Consensus-based image description evaluation. In *Proceedings of the IEEE Conference on Computer Vision and Pattern Recognition (CVPR)*, 2015.
